# Supplementary material for: Me, Me, Me
Source: Atypon-hosted journal article supplement (doi:10.1027/2151-2604/a000504), 2022-10-01
Supplement: 2151-2604_a000504_esm1.pdf [file 2151-2604_a000504_esm1.pdf]

**Electronic Supplementary Material for**

**Schyns, B., Lagowska, U., & Braun, S. H. (2022). Me, Me, Me: Narcissism and Motivation to Lead. *Zeitschrift für Psychologie*, 230(4). <https://doi.org/10.1027/2151-2604/a000504>**

## Sample items

|                                                   |                                                                                                      |
|---------------------------------------------------|------------------------------------------------------------------------------------------------------|
| <i>Motivation to Lead</i>                         |                                                                                                      |
| Affective                                         | “I like to take over a leading role.”                                                                |
| Calculative                                       | “I would only take over the role of group leader if success was reasonably certain.”                 |
| Social-normative                                  | “I was taught to volunteer when someone is needed to take the lead or take charge.”                  |
| Avoidance to lead                                 | “I find the pressure one experiences in a leadership position daunting.                              |
| <i>Narcissism</i>                                 |                                                                                                      |
| Grandiose narcissism                              | “I deserve to receive special treatment.”<br>(entitlement)                                           |
| Vulnerable narcissism                             | “I hate being criticized so much that I can’t control my temper when it happens.” (reactive anger)   |
| <i>Narcissistic organizational identification</i> | “When someone criticizes my organization, it is a personal insult because he/she is criticizing me.” |

Table E1: Means, standard deviations, and intercorrelations

|                                         | <i>M</i> | <i>SD</i> | NOI   | VN    | GN    | A-MTL  | C-MTL | SN-MTL | AL  |
|-----------------------------------------|----------|-----------|-------|-------|-------|--------|-------|--------|-----|
| Narcissistic Identification (NOI)       | 2.98     | 0.68      | .73   |       |       |        |       |        |     |
| Vulnerable Narcissism (VN) <sup>1</sup> | 2.83     | 0.60      | .41** | .72   |       |        |       |        |     |
| Grandiose Narcissism (GN) <sup>2</sup>  | 2.46     | 0.61      | .32** | .22** | .88   |        |       |        |     |
| Affective MTL (A-MTL)                   | 2.93     | 0.94      | .11   | -.08  | .51** | .94    |       |        |     |
| Calculative MTL (C-MTL)                 | 2.74     | 0.75      | .35** | .16** | .48** | .36**  | .93   |        |     |
| Social-normative MTL (SN-MTL)           | 3.08     | 0.81      | .15** | .04   | .37** | .73**  | .35** | .93    |     |
| Avoidance to lead (AL)                  | 3.11     | 1.01      | .23** | .36** | -.02  | -.25** | .31** | .00    | .83 |

*Note.* *N* = 310; MTL: Motivation to Lead. Variables measured on 5-point Likert scale; internal consistencies are in the diagonal; \*\* *p* < .01; <sup>1</sup> Second order of four subscales (Reactive Anger, Shame, Need for Admiration, and Distrust); <sup>2</sup> Second order of eleven subscales (Indifference, Exhibitionism, Authoritativeness, Thrill-Seeking, Grandiose Fantasies, Manipulativeness, Exploitativeness, Entitlement, Arrogance, Lack of Empathy, and Acclaim-Seeking).

Table E2: Moderated regression analyses grandiose narcissism with MTL as outcome

|                                   | Affective MTL |           |           |           | Calculative MTL |           |           |           |
|-----------------------------------|---------------|-----------|-----------|-----------|-----------------|-----------|-----------|-----------|
|                                   | <i>B</i>      | <i>SE</i> | 95% CI    |           | <i>B</i>        | <i>SE</i> | 95% CI    |           |
|                                   |               |           | <i>LL</i> | <i>UL</i> |                 |           | <i>LL</i> | <i>UL</i> |
| (Constant)                        | .91           | .79       | -.64      | 2.47      | .16             | .62       | -1.06     | 1.38      |
| Grandiose Narcissism (GN)         | .92           | .33       | .27       | 1.57      | .76             | .26       | .26       | 1.27      |
| Narcissistic Identification (NOI) | .01           | .24       | -.47      | .48       | .43             | .19       | .06       | .81       |
| Interaction GN * NOI              | -.04          | .10       | -.23      | .15       | -.08            | .08       | -.23      | .07       |
| <i>R</i> <sup>2</sup>             |               |           |           | .26       |                 |           |           | .28       |

Note. *N* = 310; MTL: Motivation to Lead

Table E2: Moderated regression analyses grandiose narcissism with MTL as outcome (continued)

|                                   | Social-Normative MTL |           |           |           | Avoidance to lead |           |           |           |
|-----------------------------------|----------------------|-----------|-----------|-----------|-------------------|-----------|-----------|-----------|
|                                   | <i>B</i>             | <i>SE</i> | 95% CI    |           | <i>B</i>          | <i>SE</i> | 95% CI    |           |
|                                   |                      |           | <i>LL</i> | <i>UL</i> |                   |           | <i>LL</i> | <i>UL</i> |
| (Constant)                        | 1.84                 | .73       | .40       | 3.29      | 1.84              | .73       | .40       | 3.29      |
| Grandiose Narcissism (GN)         | .45                  | .30       | -.15      | 1.05      | .45               | .30       | -.15      | 1.05      |
| Narcissistic Identification (NOI) | .02                  | .22       | -.42      | .47       | .02               | .22       | -.42      | .47       |
| Interaction GN * NOI              | .01                  | .09       | -.17      | .18       | .01               | .09       | -.17      | .18       |
| <i>R</i> <sup>2</sup>             |                      |           |           | .14       |                   |           |           | .14       |

Table E3: Moderated regression analyses vulnerable narcissism with MTL as outcome

|                                   | Affective MTL |           |           |           | Avoidance to lead |           |           |           |
|-----------------------------------|---------------|-----------|-----------|-----------|-------------------|-----------|-----------|-----------|
|                                   | <i>B</i>      | <i>SE</i> | 95% CI    |           | <i>B</i>          | <i>SE</i> | 95% CI    |           |
|                                   |               |           | <i>LL</i> | <i>UL</i> |                   |           | <i>LL</i> | <i>UL</i> |
| (Constant)                        | 4.42          | .94       | 2.57      | 6.26      | -.14              | .95       | -1.99     | 1.73      |
| Grandiose Narcissism (GN)         | -.79          | .34       | -1.47     | -.12      | 1.01              | .35       | .33       | 1.69      |
| Narcissistic Identification (NOI) | -.28          | .31       | -.89      | .33       | .59               | .31       | -.02      | 1.21      |
| Interaction GN * NOI              | .19           | .11       | -.03      | .40       | -.16              | .11       | -.37      | .05       |
| <i>R</i> <sup>2</sup>             |               |           |           | .04       |                   |           |           | .14       |

Note. *N* = 310; MTL: Motivation to Lead

Table E4: Moderating effects of narcissistic organizational identification on the relationship between vulnerable narcissism and affective MTL

| <i>M</i> of Narcissistic Organizational Identification | Effect | <i>SE</i> | 95% CI    |           | <i>p</i> |
|--------------------------------------------------------|--------|-----------|-----------|-----------|----------|
|                                                        |        |           | <i>LL</i> | <i>UL</i> |          |
| 2.33                                                   | -.36   | .12       | -.60      | -.12      | .0034    |
| 3.00                                                   | -.24   | .10       | -.43      | -.05      | .014     |
| 3.59                                                   | -.13   | .11       | -.35      | .09       | .257     |

*Note.* *N* = 310
